# Supplementary material for: Overexpression of BUB1B, CCNA2, CDC20, and CDK1 in tumor tissues predicts poor survival in pancreatic ductal adenocarcinoma
Source: Oxford University Press journal article supplement (doi:10.1042/bsr20182306), 2019-02-01

**Figure S1** Relative log expression (A) and Normalized unscaled standard errors (B) assessment of GSE46234

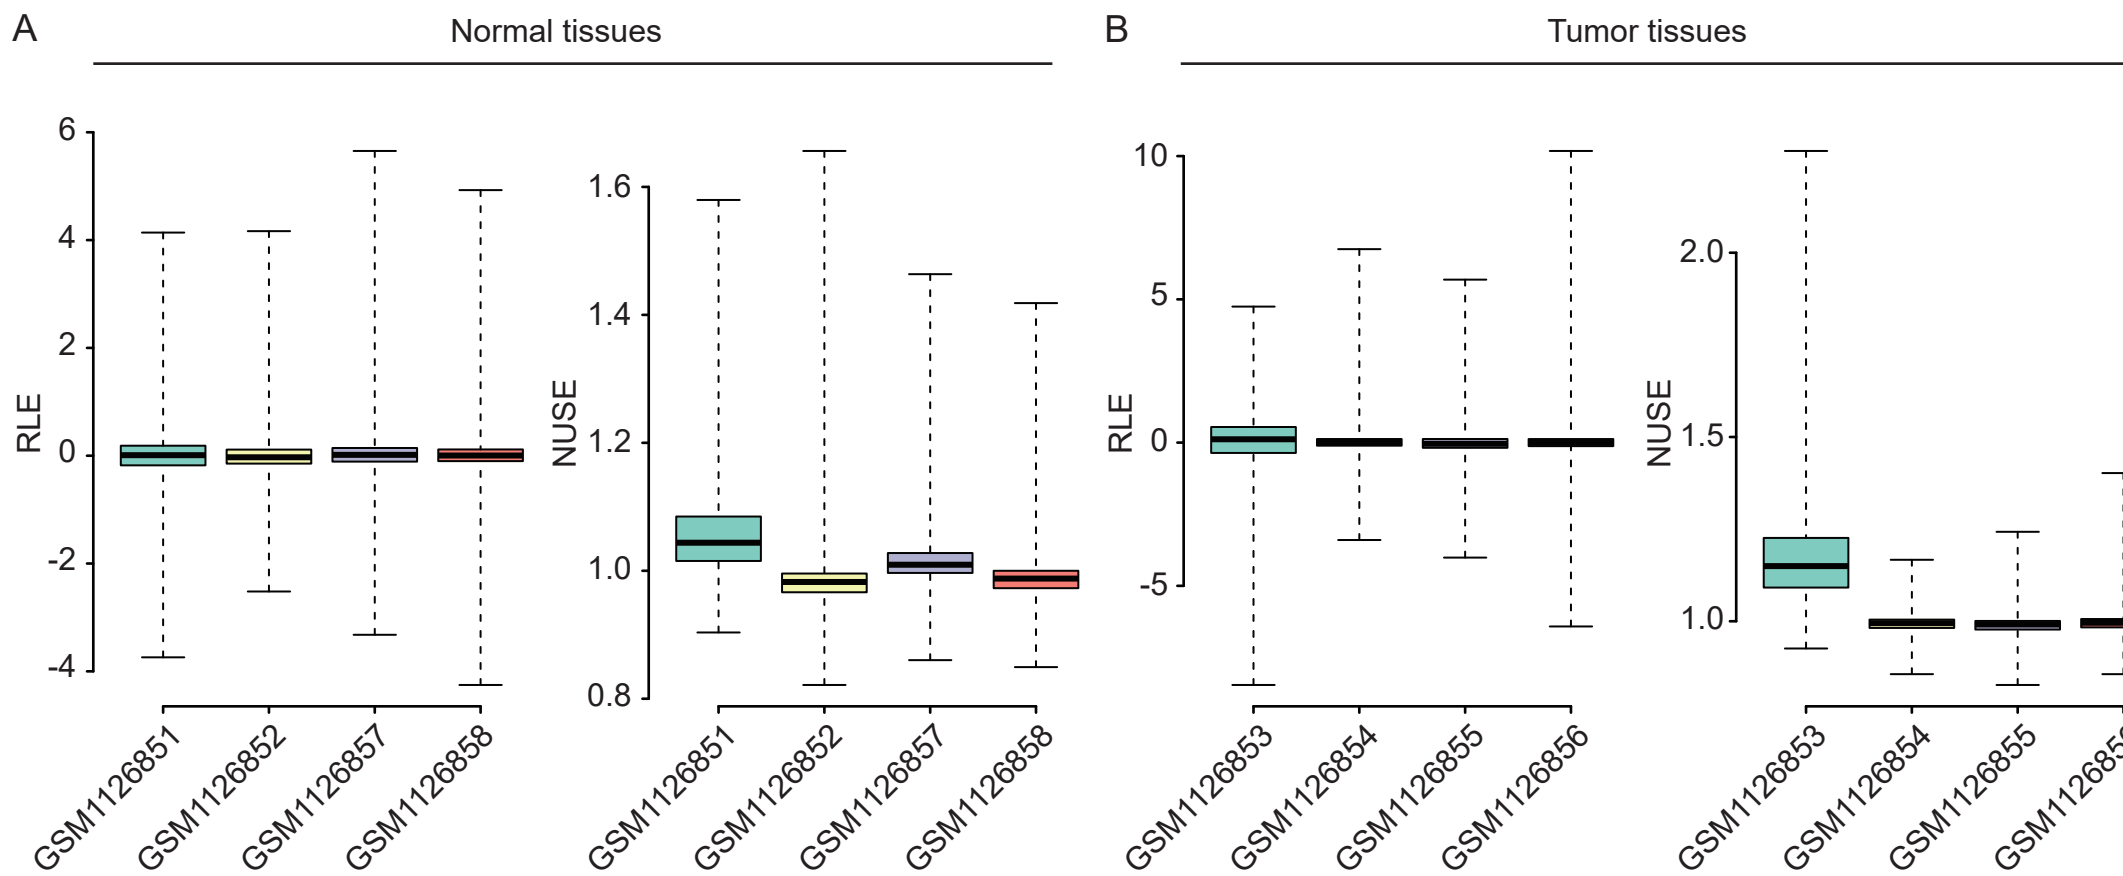

**Figure S2** Relative log expression (A) and Normalized unscaled standard errors (B) assessment of GSE71989

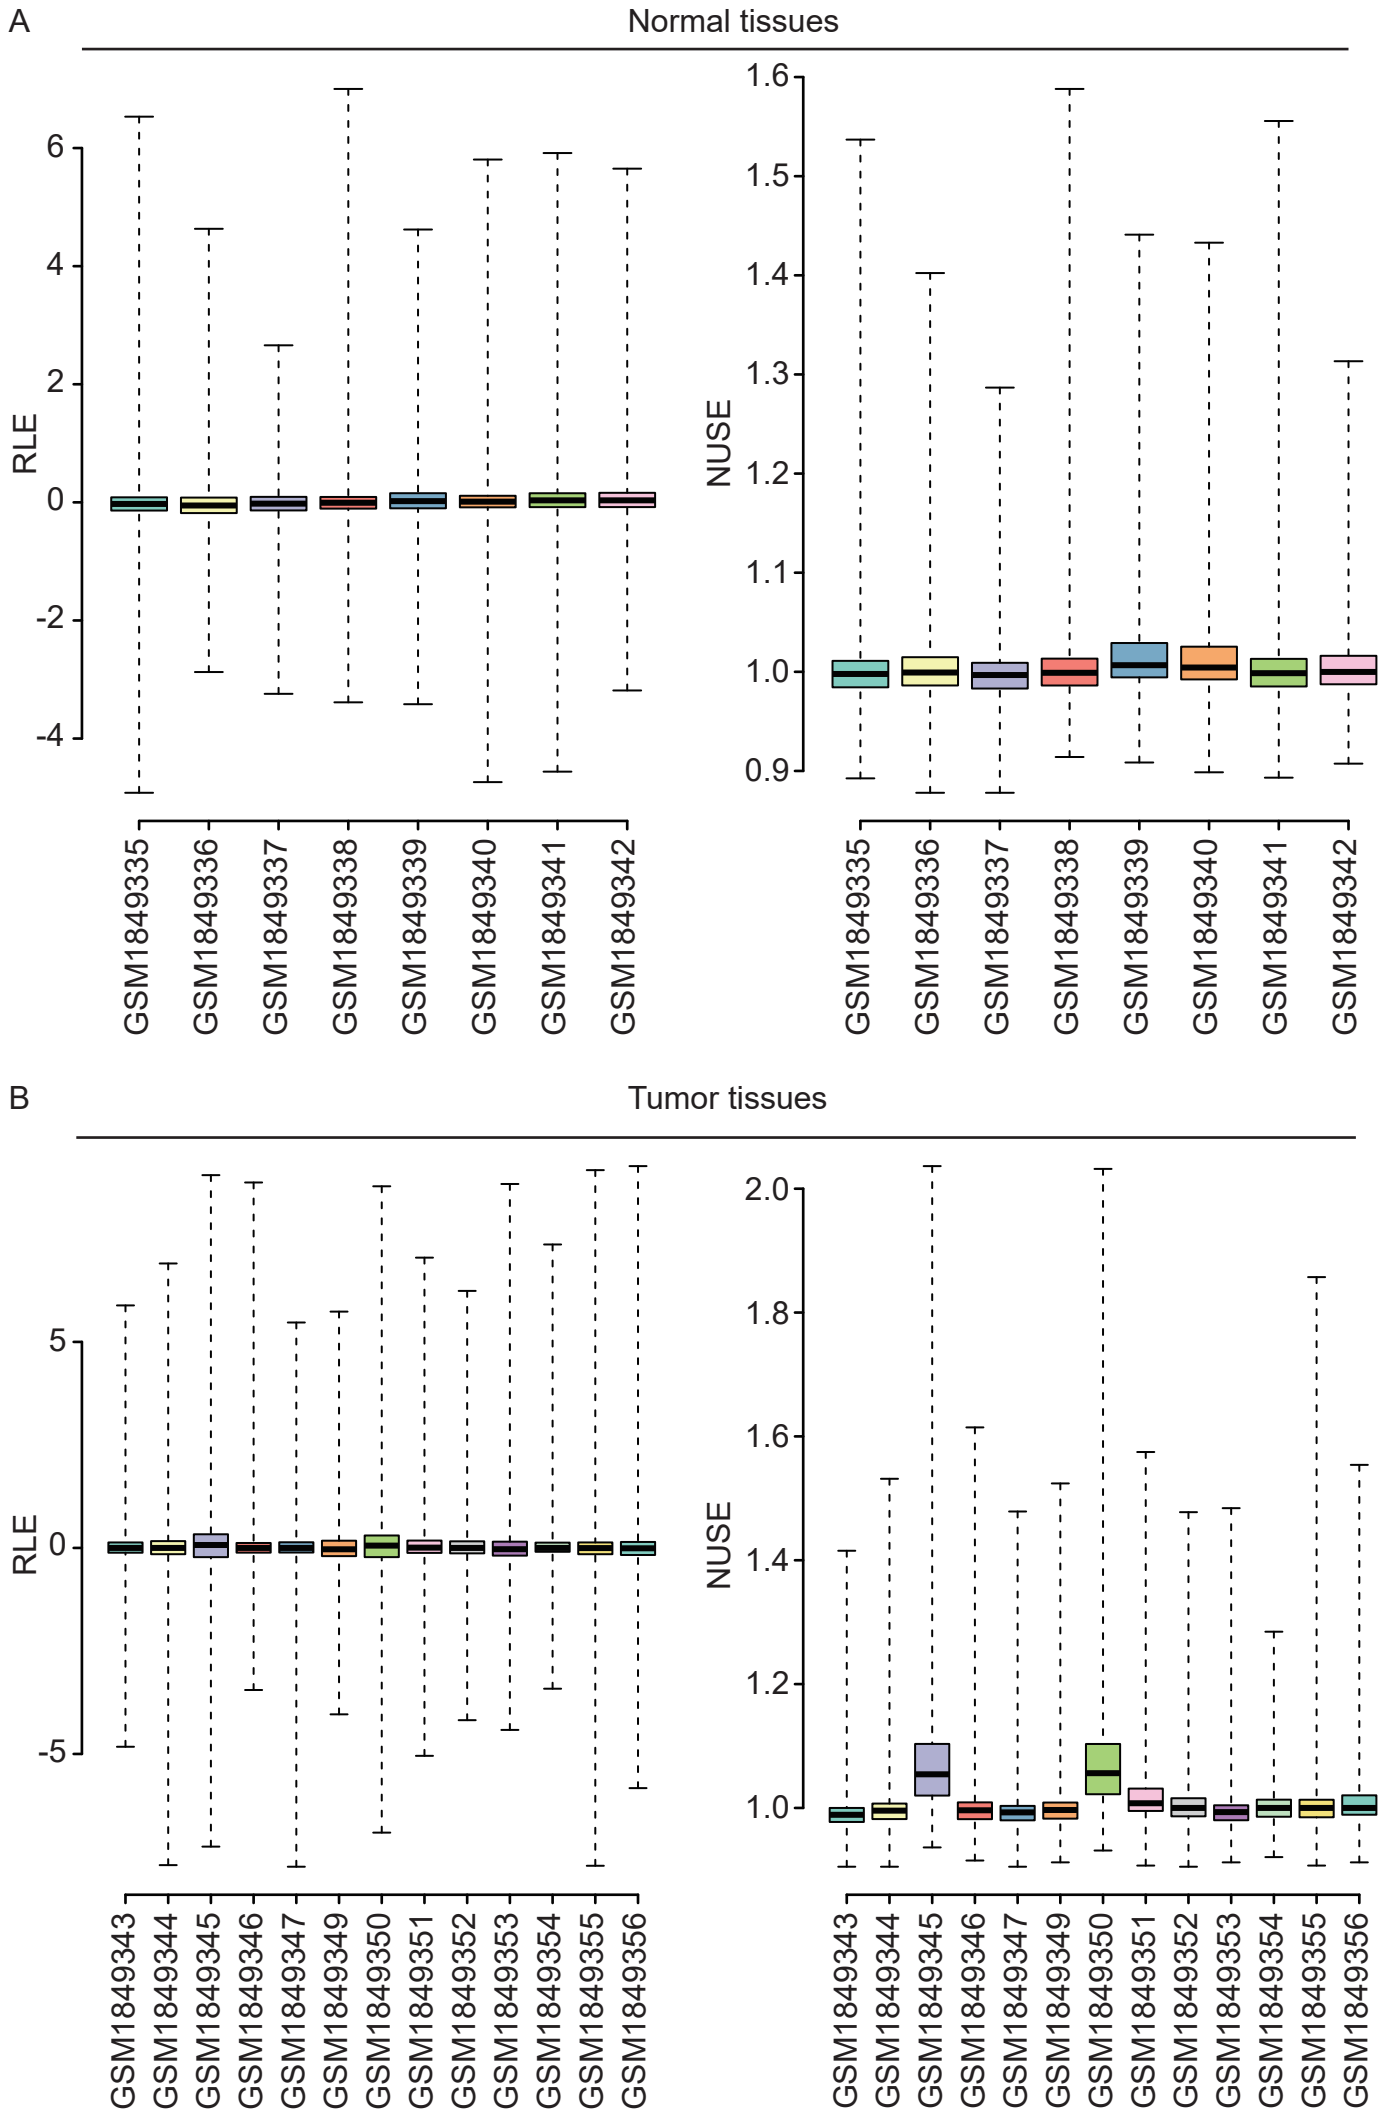

**Figure S3** Relative log expression (A) and Normalized unscaled standard errors (B) assessment of GSE107610

A

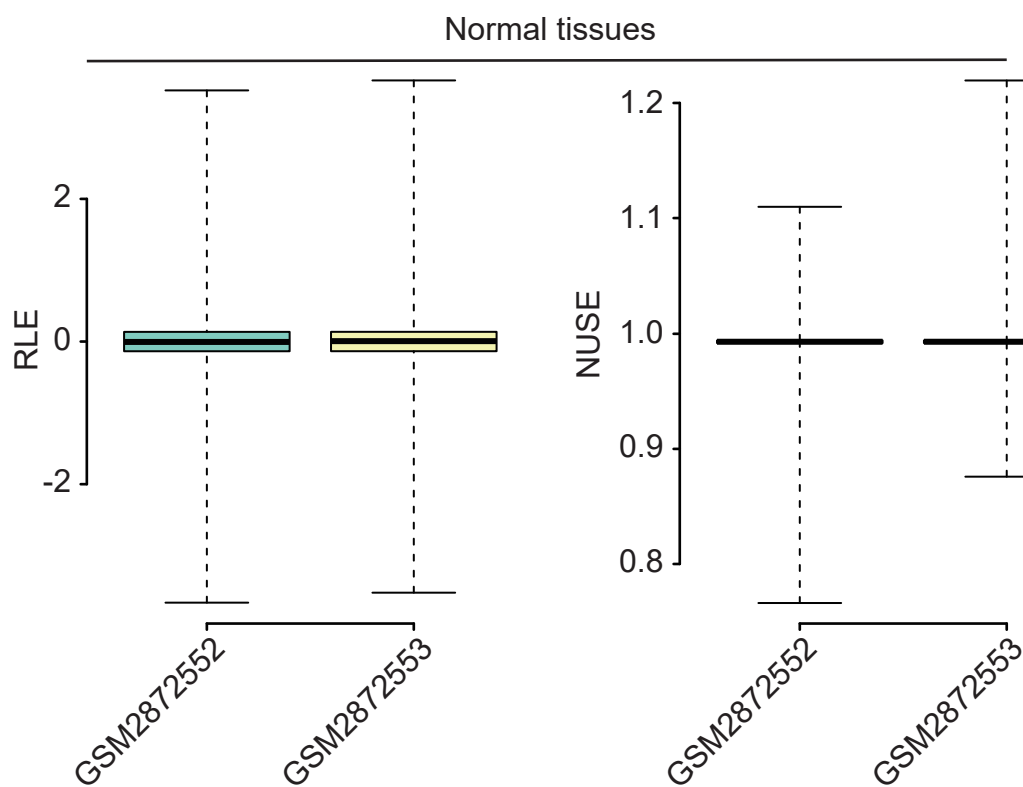

B

Tumor tissues

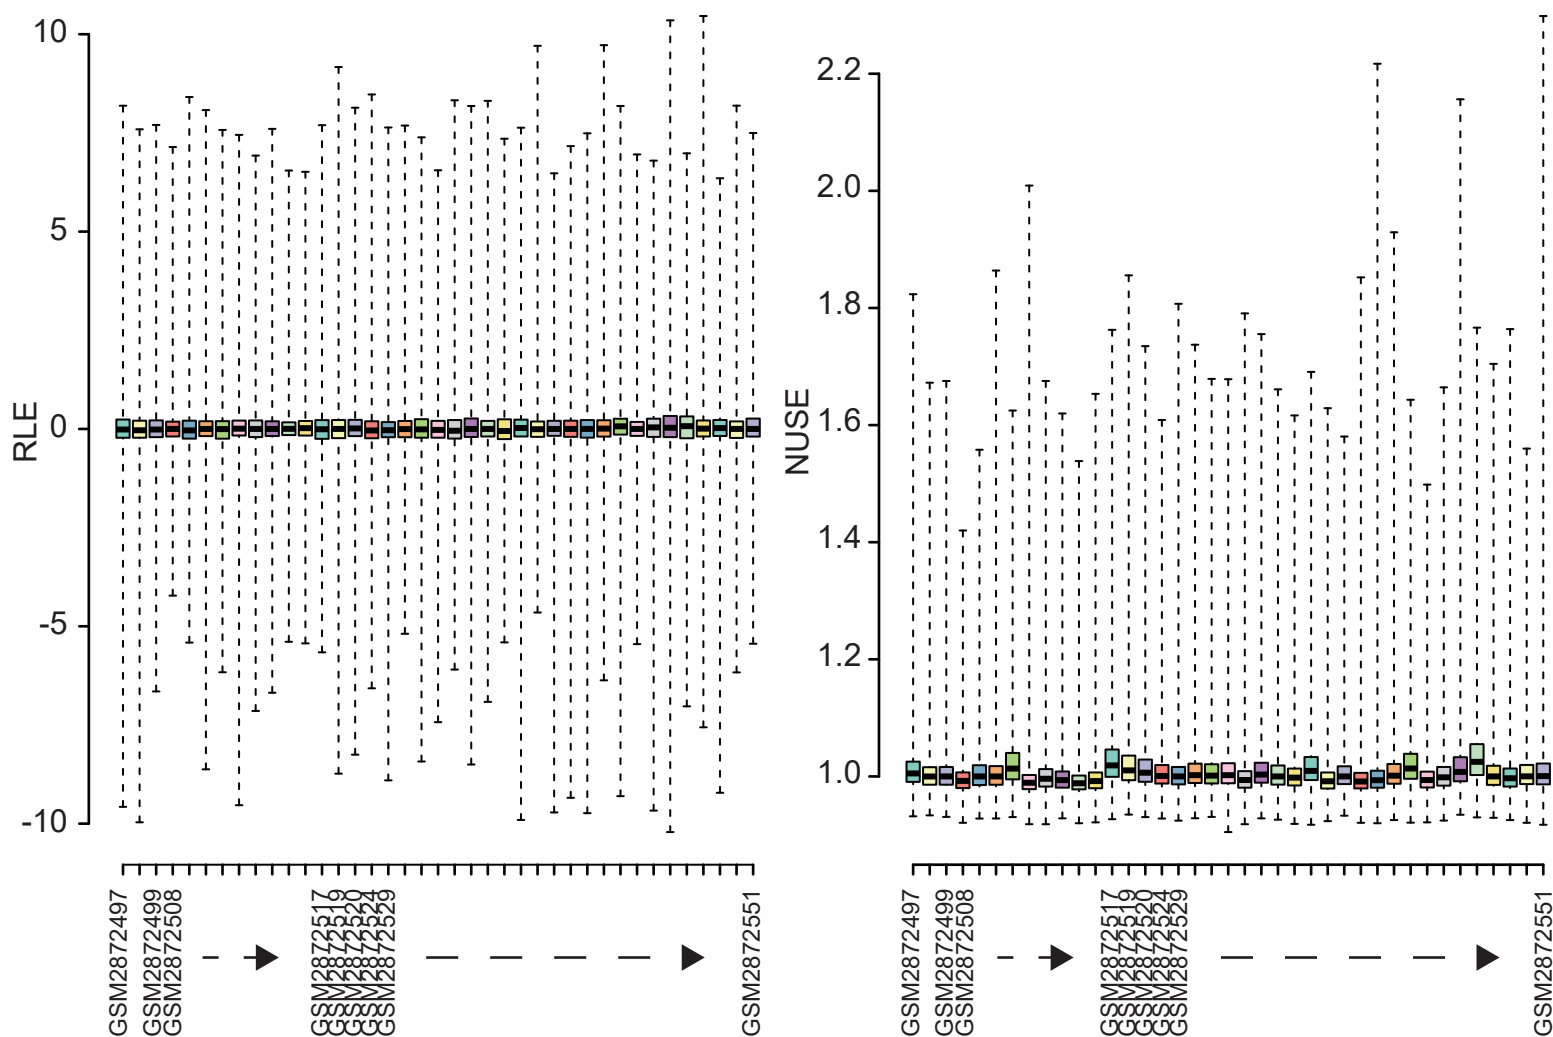

Supplement: bsr-2018-2306_supp.pdf [file bsr-2018-2306_supp.pdf]
